# Supplementary material
Source: MDPI journal article supplement (https://www.mdpi.com/2071-1050/12/5/1923)
Supplement: s1 [file s1]

Archive with 3 entries (3 files):
- Reviewer_1.pdf
- Reviewer_2.pdf
- Reviewer_3.pdf
