# Supplementary material
Source: MDPI journal article supplement (https://www.mdpi.com/2071-1050/12/5/1923)
Supplement: s1 [file s1]

First, we want to thank you for your suggestions and comments that help us improve the quality of this paper. All the revision work is done in the manuscript, highlighted in yellow and it is listed below, point by point (in blue), according to your suggestions (in black).

Solar power can be generated at parking structures or neighboring buildings with lower utility to meet the target for individual structures.

Buildings with glass windows tend to loose more heat (in winter day) and increase heat (in summer days) - requiring additional heating or cooling - which strains the systems. Authors must considers implementation efficient windows (multi-panel/screens etc) to reduce energy consumption for the building.

The authors only considered the possibility to install the system in the building, having collected the data. The glasses will have two layers when the panel is incorporated on it, leading to small heat losses. Thus, authors assume that the heating/cooling system already implemented on the tower is sufficient and the energy consumption due to its work is not going to vary a lot.
