# Supplementary material
Source: MDPI journal article supplement (https://www.mdpi.com/2071-1050/12/5/1923)
Supplement: s1 [file s1]

First, we want to thank you for your suggestions and comments that help us improve the quality of this paper. All the revision work is done in the manuscript, highlighted in yellow and it is listed below, point by point (in blue), according to your suggestions (in black).

The topic is interesting, but the methodology lacks rigors. A methodology section is needed, and the abstract has to include quantitative results.

As suggested, it was created a new subsection (5.1. Methodology) to describe the methodology used to design the system. Also, some conclusion ideas and results are now described on the abstract.

The manuscript title does not match the content, as “optimization” was not considered, and the application for “a company” was nowhere mentioned in the main text.

The title changed in order to concretely describe what is studied on the paper. The current title is now “Socio-economic Study to Improve the Electrical Sustainability of the North Tower of Instituto Superior Técnico”.
