# Supplementary material
Source: MDPI journal article supplement (https://www.mdpi.com/2071-1050/12/5/1923)
Supplement: s1 [file s1]

First, we want to thank you for your suggestions and comments that help us improve the quality of this paper. All the revision work is done in the manuscript, highlighted in yellow and it is listed below, point by point (in blue), according to your suggestions (in black).

1. On page 3, 99 line: "HAWTs" -> "horizontal axis wind turbines (HAWTs)"

We change the text in order to meet the suggestion.

2. On page 7, please provide the specifications and information (e.g., manufacturer, fundamental cell structures, etc.) of two photovoltaic systems of PS-M-NX panels and PS-PC-SE glass panels in the manuscript.

We provide the information about the manufacturer in the first sentence where both panels are referred. However, a table (table A1) on the Appendix A is now presented in order to summarise the specifications for the three used panels.

3. On page 9, equation (7), please double-check the value of '36' rows. It should be 26 rows.

The correct value is 26, as it is presented on the text. The system was designed considering 26 rows and not 36. Thus, this mistake does not interfere with any other calculation.

4. On page 13, in Tables 2 and 3, what is the difference between two solutions? Why are the units of PS-M-NX (€/m<sup>2</sup>) panels and PS-PC-SE (€/W) different?

In this study and manuscript, it is analysed two different solutions to cover the facades. The first one using amorphous panels (considering PS-M-NX panels) and the second one, using crystalline panels (considering PS-PC-SE panels). The comparison between both solutions is presented on page 13, between line 322 and line 335.

The considered amorphous panels is sold per m<sup>2</sup>, and so that the total panels' price that should be considered is given by price per m<sup>2</sup> multiplied by the total area. However, the crystalline panel is sold per watt, or in other words, the manufacture considered the price for the panel's nominal produced power. In this solution, the total price is determined by multiplying the cost per watt by the power that it is previously calculated for the panels.

5. On page 14, please provide the specifications of Talon 10 wind turbines in the manuscript.

It is presented now on Appendix A a table (table A2) where the specifications of this turbine are detailed.

6. 6. Can the authors give information on noise (e.g., dB) level for Talon 10 wind turbines as a function of wind speed?

The manufacture specifies the maximum noise power as 65 dB, which is lower than the painful power limit (approximately 100~120 dB). This specification is also detailed on table A2, presented on Appendix A.
